# Supplementary material for: Inflammation-associated microbiota in pediatric eosinophilic esophagitis
Source: PubMed Central journal article supplement (PMC4450515; doi:10.1186/s40168-015-0085-6), 2015-06-01
Supplement: 40168_2015_85_MOESM2_ESM.pdf [file 40168_2015_85_MOESM2_ESM.pdf]

**Eosinophilic Esophagitis**

| ID  | Point | Site | Status | Symptoms    | Age    | Gender | Race  | Atopy          | FA | Steroids | Dietary Intervention                                                                                                                                                                               | Duration (months) | EGD findings                    | Histologic Findings                                                                                                            | Eos |
|-----|-------|------|--------|-------------|--------|--------|-------|----------------|----|----------|----------------------------------------------------------------------------------------------------------------------------------------------------------------------------------------------------|-------------------|---------------------------------|--------------------------------------------------------------------------------------------------------------------------------|-----|
| E01 | 1     | O    | I      | none        | 4y 6m  | M      | C     | Asthma         | Y  | N        | restricting milk and oat                                                                                                                                                                           | 34                | Normal                          | Mild esophagitis with few infiltrating lymphocytes and eosinophils                                                             | 3   |
|     | 2     | O    | A      | none        | 7y 3m  | M      | C     |                |    | N        | added milk                                                                                                                                                                                         |                   | Furrows                         | Severe esophagitis characterized by innumerable intraepithelial eosinophils associated with marked reactive epithelial changes | 100 |
| E02 | 1     | OE   | I      | unknown     | 6y 9m  | M      | C     | AR             | Y  | N        | added oat and restricting milk, egg, peanut, beef, chicken, pork, apple, cinnamon, pecans, fish, shellfish, lamb, soy                                                                              | 4                 | Normal                          | No pathologic diagnosis                                                                                                        | 0   |
|     | 2     | OE   | A      | none        | 7y 1m  | M      | C     |                |    | N        | added soy                                                                                                                                                                                          |                   | Furrows                         | Numerous intraepithelial eosinophils and severe reactive epithelial changes                                                    | 50  |
| E03 | 1     | OE   | I      | none        | 9y 0m  | M      | C     | AD, AR, Asthma | Y  | N        | restricting milk, egg, shellfish, chicken, spinach, peas, citrus, turkey, kiwi, pineapple, soy, coconut, corn, rice, blueberry, apple, pear, barley, wheat, lamb, beef, pumpkin, pork, green beans | 3                 | Normal                          | Very mild esophagitis with few infiltrating eosinophils                                                                        | 2   |
|     | 2     | OE   | A      | unknown     | 9y 3m  | M      | C     |                |    | N        | added corn                                                                                                                                                                                         |                   | Esophagitis                     | Moderately inflamed squamous mucosa                                                                                            | 20  |
| E04 | 1     | OE   | I      | none        | 5y 7m  | M      | Other | AR, Asthma     | Y  | N        | added corn and tomato and restricting peanuts, egg, tree nuts, sesame seeds, soy, wheat, beef, chicken, pork, turkey, potato, carrot, green beans, milk, rice, oats, peach, shellfish              | Single time point | Normal                          | No pathologic diagnosis                                                                                                        | 0   |
| E05 | 1     | OE   | I      | none        | 2y 0m  | F      | C     | unknown        | Y  | N        | restricting milk, egg, wheat, soy, rice, barley, meats, peanuts, oat, white potato, corn                                                                                                           | Single time point | Normal                          | Rare intraepithelial eosinophils                                                                                               | 2   |
| E06 | 1     | E    | I      | none        | 17y 9m | M      | AA    | AR             | Y  | N        | restricting milk, beef, peanut, tree nuts, shellfish                                                                                                                                               | 4                 | Normal                          | No pathologic diagnosis                                                                                                        | 0   |
|     | 2     | E    | I      | unknown     | 18y 0m | M      | AA    |                |    | N        | added milk                                                                                                                                                                                         |                   |                                 | No pathologic diagnosis                                                                                                        | 0   |
| E07 | 1     | OE   | A      | obstructive | 15y 5m | F      | C     | AR, Asthma     | Y  | N        | restricting milk and wheat                                                                                                                                                                         | 3                 | Furrows, rings, thickened folds | Esophagitis with reactive changes and variable intraepithelial eosinophils                                                     | 15  |
|     | 2     | OE   | I      | unknown     | 15y 9m | F      | C     |                |    | Y        | added milk and wheat                                                                                                                                                                               |                   | Furrows                         | No pathologic diagnosis                                                                                                        | 0   |

|     |   |    |   |                  |         |   |   |                |   |   |                                                                                                                                                                        |                   |                                 |                                                                                                                  |    |
|-----|---|----|---|------------------|---------|---|---|----------------|---|---|------------------------------------------------------------------------------------------------------------------------------------------------------------------------|-------------------|---------------------------------|------------------------------------------------------------------------------------------------------------------|----|
| E08 | 1 | OE | A | obstructive, GER | 15y 2m  | M | C | Asthma         | N | N | open diet                                                                                                                                                              | 3                 | Furrows, rings                  | Esophagitis with reactive squamous mucosa and intraepithelial eosinophils                                        | 18 |
|     | 2 | OE | I | unknown          | 15y 5m  | M | C |                |   | N | removed oat, peanuts and soy                                                                                                                                           |                   | Furrows                         | Mild esophagitis with rare intraepithelial eosinophils and lymphocytes associated with reactive squamous mucosa. | 3  |
| E09 | 1 | OE | A | GER              | 4y 4m   | F | C | AD             | Y | N | added corn and restricting egg, milk, wheat, soy, peanut, beef, chicken, turkey, salmon, garlic, potato                                                                | Single time point | Erythema, furrows               | Moderate to severe esophagitis with superficially clustered eosinophils and reactive epithelial changes.         | 20 |
| E10 | 1 | OE | I | GER              | 9y 3m   | M | C | AR, Asthma     | Y | N | added corn and restricting peanut, egg, peas, carrot, sweet potato, tree nuts, milk                                                                                    | 12                | Normal                          | Mild esophagitis with eosinophils and reactive epithelial changes                                                | 6  |
|     | 2 | O  | A | none             | 10y 2m  | M | C |                |   | N | added milk                                                                                                                                                             |                   | Furrows                         | Esophagitis with intraepithelial eosinophils, lymphocytes and reactive epithelial changes                        | 25 |
| E11 | 1 | OE | A | obstructive, GER | 12y 0m  | M | C | none           | Y | N | added egg and restricting peanuts                                                                                                                                      | 3                 | Furrows                         | Lymphocytic and eosinophilic infiltrate with little reactive epithelial changes                                  | 28 |
|     | 2 | OE | I | unknown          | 12y 3m  | M | C |                |   | N | removed egg                                                                                                                                                            |                   |                                 | Minimally inflamed squamous mucosa                                                                               | 3  |
| E12 | 1 | O  | A | obstructive      | 10y 4m  | M | C | AD, Asthma     | Y | N | restricting soy, peanut, tree nuts                                                                                                                                     | 2                 | Furrows, rings, thickened folds | Intraepithelial eosinophils and marked reactive epithelial changes                                               | 18 |
|     | 2 | O  | A | unknown          | 10y 6m  | M | C |                |   | Y | removed milk                                                                                                                                                           |                   | Edema, furrows, rings           | Moderate esophagitis with variable infiltrating lymphocytes and eosinophils and reactive epithelial changes      | 60 |
| E13 | 1 | OE | I | obstructive      | 18y 8m  | M | C | AR, Asthma     | Y | N | Restricting all food and added amino acid based elemental formula                                                                                                      | 2                 | Edema, furrows                  | Few infiltrating eosinophils and mild reactive epithelial cells                                                  | 6  |
|     | 2 | O  | A | unknown          | 18y 10m | M | C |                |   | N | added celery, cucumber, lettuce and beef                                                                                                                               |                   | Normal                          | Esophagitis with variable numbers of intraepithelial eosinophils                                                 | 50 |
| E14 | 1 | OE | A | GER              | 18y 8m  | M | C | AR, Asthma     | Y | Y | removed milk and restricting soy, pork, egg, tree nuts                                                                                                                 | 3                 | Normal                          | Focally increased intraepithelial eosinophils                                                                    | 17 |
|     | 2 | OE | I | unknown          | 18y 11m | M | C |                |   | N | added egg                                                                                                                                                              |                   | Normal                          | Minimally inflamed squamous mucosa with scattered intraepithelial eosinophils                                    | 0  |
| E15 | 1 | E  | I | none             | 6y 5m   | M | C | AD, AR, Asthma | Y | N | removed corn and carrots and restricting milk, eggs, tree nuts, pork, wheat, beef, corn, soy, barley, green beans, pear, banana, sweet potato, peanut, coconut, carrot | Single time point | Normal                          | Squamous mucosa with some intraepithelial eosinophils                                                            | 12 |

|     |   |    |   |                             |        |   |    |                |   |   |                                                                                                                                                                                 |                   |                         |                                                                                                                   |     |
|-----|---|----|---|-----------------------------|--------|---|----|----------------|---|---|---------------------------------------------------------------------------------------------------------------------------------------------------------------------------------|-------------------|-------------------------|-------------------------------------------------------------------------------------------------------------------|-----|
| E16 | 1 | OE | A | obstructive, abdominal pain | 17y 3m | M | C  | AD, AR, Asthma | Y | N | restricting peanuts and turkey                                                                                                                                                  | 4                 | Furrows                 | Inflamed squamous mucosa with intraepithelial eosinophils and reactive epithelial cells                           | 15  |
|     | 2 | E  | I | none                        | 17y 7m | M | C  |                |   | N | open diet                                                                                                                                                                       |                   | Furrows                 | No pathologic diagnosis                                                                                           | 0   |
| E17 | 1 | OE | I | none                        | 3y 2m  | M | AA | AD, Asthma     | Y | N | added turkey, white potato, sweet potato, oat, carrot, broccoli, grapes, bananas, string beans, tomato, apple, honey, cinnamon and also restricting milk, peanuts and tree nuts | Single time point | Normal                  | Minimally inflamed squamous mucosa                                                                                | 1   |
| E18 | 1 | OE | I | abdominal pain              | 7y 10m | M | C  | AD, Asthma     | Y | N | restricting wheat, egg, pork and milk                                                                                                                                           | 2                 | Normal                  | Mildly inflamed squamous mucosa                                                                                   | 3   |
|     | 2 | OE | A | none                        | 8y 0m  | M | C  |                |   | N | added wheat                                                                                                                                                                     |                   | Normal                  | Mild to moderate esophagitis and reactive epithelial changes                                                      | 15  |
| E19 | 1 | OE | I | none                        | 7y 6m  | M | C  | none           | Y | N | added pork and restricting milk, turkey, beef, sunflower oil                                                                                                                    | 4                 | Normal                  | Squamous mucosa with rare intraepithelial eosinophils                                                             | 3   |
|     | 2 | OE | A | none                        | 7y 10m | M | C  |                |   | N | added beef                                                                                                                                                                      |                   | Furrows, plaques        | Reactive squamous mucosa with intraepithelial eosinophils with microabscess formation consistent with esophagitis | 100 |
| E20 | 1 | OE | I | obstructive                 | 9y 1m  | M | C  | AD, AR, Asthma | Y | N | added white potato and restricting egg, milk, wheat, soy, beef, corn, chicken, garlic, green beans, tree nuts, peanuts, peas, sesame seeds, tomato, apples, rice, tuna, turkey  | 5                 | Furrows                 | Moderate to severe esophagitis with variable eosinophil infiltrate and reactive epithelial changes.               | 12  |
|     | 2 | OE | A | other                       | 9y 7m  | M | C  |                |   | N | added corn                                                                                                                                                                      |                   | Furrows                 | Esophagitis associated with reactive epithelial changes                                                           | 60  |
| E21 | 1 | OE | I | abdominal pain              | 8y 7m  | M | C  | AD, Asthma     | Y | N | restricting milk                                                                                                                                                                | 9                 | Normal                  | No pathologic diagnosis                                                                                           | 0   |
|     | 2 | OE | A | none                        | 9y 4m  | M | C  |                |   | N | added milk                                                                                                                                                                      |                   | Normal                  | Focally inflamed squamous mucosa                                                                                  | 15  |
| E22 | 1 | OE | A | obstructive                 | 14y 6m | M | C  | none           | Y | N | open diet                                                                                                                                                                       | 5                 | Friable mucosa, furrows | Inflamed squamous mucosa                                                                                          | 50  |
|     | 2 | OE | A | abdominal pain              | 15y 0m | M | C  |                |   | N | removed milk and eggs                                                                                                                                                           |                   | Furrows                 | Mildly inflamed squamous mucosa                                                                                   | 15  |
| E23 | 1 | OE | A | obstructive, GER            | 11y 2m | M | C  | AD, AR, Asthma | Y | N | restricting peanut, wheat, shellfish, milk (cow's), soy, egg, potato, tomato, corn                                                                                              | 1                 | Edema, furrows          | Increased intraepithelial lymphocytes and eosinophils with reactive epithelial cells                              | 30  |
|     | 2 | E  | I | none                        | 11y 4m | M | C  |                |   | N | restricting all foods and added amino acid based elemental formula                                                                                                              |                   | Furrows                 | Squamous mucosa with few intraepithelial eosinophils and mild to moderate epithelial changes                      | 8   |

|     |   |    |   |                     |         |   |    |                |   |   |                                                                                           |                   |                           |                                                                                                                         |    |
|-----|---|----|---|---------------------|---------|---|----|----------------|---|---|-------------------------------------------------------------------------------------------|-------------------|---------------------------|-------------------------------------------------------------------------------------------------------------------------|----|
| E24 | 1 | OE | A | GER, abdominal pain | 13y 1m  | M | C  | Asthma         | Y | N | open diet                                                                                 | 4                 | Normal                    | Inflamed squamous mucosa                                                                                                | 20 |
|     | 2 | OE | A | abdominal pain      | 13y 5m  | M | C  |                |   | N | removed milk                                                                              |                   | Normal                    | Inflamed squamous mucosa with increased infiltrating lymphocytes and reactive epithelial changes                        | 23 |
| E25 | 1 | O  | A | none                | 4y 0m   | M | C  | Asthma         | Y | N | removed egg, pork, turkey, chicken, apple, oat and corn                                   | 6                 | Furrows                   | Focally inflamed squamous mucosa                                                                                        | 40 |
|     | 2 | O  | I | none                | 4y 6m   | M | C  |                |   | N | removed egg, wheat, milk and corn                                                         |                   | Furrows                   | Minimally inflamed squamous mucosa with very rare eosinophils                                                           | 0  |
| E26 | 1 | O  | I | GER, abdominal pain | 11y 9m  | M | AA | AD, AR, Asthma | Y | N | removed chicken, milk, nuts, peanuts, soy, strawberry, wheat, pork, lamb, turkey, peaches | Single time point | Normal                    | Mild esophagitis                                                                                                        | 8  |
| E27 | 1 | O  | A | GER                 | 2y 7m   | M | C  | AD             | Y | N | open diet                                                                                 | 4                 | Normal                    | Squamous mucosa with basal cell hyperplasia, elongation papillae, increased intraepithelial lymphocytes and eosinophils | 22 |
|     | 2 | O  | A | none                | 2y 11m  | M | C  |                |   | N | removed milk                                                                              |                   | White plaques             | Moderate esophagitis with infiltrating lymphocytes, eosinophils and reactive epithelial changes.                        | 20 |
| E28 | 1 | OE | A | none                | 9y 6m   | M | C  | AD, AR, Asthma | Y | N | removed peanuts and tree nuts                                                             | 4                 | Furrows                   | Squamous mucosa with eosinophils and reactive epithelial changes                                                        | 30 |
|     | 2 | O  | I | unknown             | 9y 11m  | M | C  |                |   | N | removed milk, wheat, soy, egg and barley                                                  |                   |                           | Squamous mucosa with a few infiltrating lymphocytes and a rare single eosinophil compatible with very mild esophagitis  | 1  |
| E29 | 1 | OE | A | obstructive         | 10y 3m  | M | C  | none           | Y | N | removed tree nuts                                                                         | 4                 | Friability, white plaques | Moderate to severe esophagitis with variable lymphocyte and eosinophil infiltrate and reactive epithelial changes       | 80 |
|     | 2 | O  | I | obstructive         | 10y 7m  | M | C  |                |   | N | removed egg, milk and wheat                                                               |                   | Furrows                   | Minimally inflamed squamous mucosa with an occasional eosinophil                                                        | 0  |
| E30 | 1 | OE | A | obstructive         | 6y 3m   | M | C  | AD, Asthma     | Y | N | removed soy and cantaloupe                                                                | 2                 | Furrows                   | Variably inflamed squamous mucosa in association with reactive epithelial changes                                       | 60 |
|     | 2 | OE | A | abdominal pain      | 6y 6m   | M | C  |                |   | N | removed milk, egg, peanuts, tree nuts                                                     |                   | Furrows                   | Esophagitis associated with reactive epithelial changes                                                                 | 40 |
| E31 | 1 | OE | A | none                | 10y 11m | F | C  | AR, Asthma     | Y | N | added milk and soy and restricting peanuts, tree nuts                                     | 5                 | Furrows                   | Variably inflamed squamous mucosa                                                                                       | 50 |
|     | 2 | OE | A | obstructive         | 11y 4m  | F | C  |                |   | N | removed wheat                                                                             |                   | Furrows                   | Squamous mucosa with focally severe inflammation                                                                        | 40 |
| E32 | 1 | OE | A | none                | 10y 3m  | M | C  | none           | Y | N | restricting milk and eggs                                                                 | 4                 | Normal                    | Squamous mucosa with some intraepithelial eosinophils                                                                   | 15 |
|     | 2 | OE | A | none                | 10y 7m  | M | C  |                |   | N | removed wheat                                                                             |                   | Normal                    | Squamous mucosa with many intraepithelial eosinophils and mild reactive epithelial changes                              | 28 |

|     |   |    |   |      |         |   |   |    |   |   |              |   |                |                                                                                                            |    |
|-----|---|----|---|------|---------|---|---|----|---|---|--------------|---|----------------|------------------------------------------------------------------------------------------------------------|----|
| E33 | 1 | OE | A | none | 15y 11m | M | C | AR | Y | N | open diet    | 4 | Furrows, rings | Esophagitis with numerous intraepithelial eosinophil granules, associated with reactive epithelial changes | 15 |
|     | 2 | OE | I | none | 16y 4m  | M | C |    |   | N | removed milk |   | Rings          | Minimally inflamed squamous mucosa                                                                         | 1  |
