# Supplementary material for: Inflammation-associated microbiota in pediatric eosinophilic esophagitis
Source: PubMed Central journal article supplement (PMC4450515; doi:10.1186/s40168-015-0085-6), 2015-06-01

## Supplemental Figure 3

### Streptococcus

**A** $p = 0.0128$ 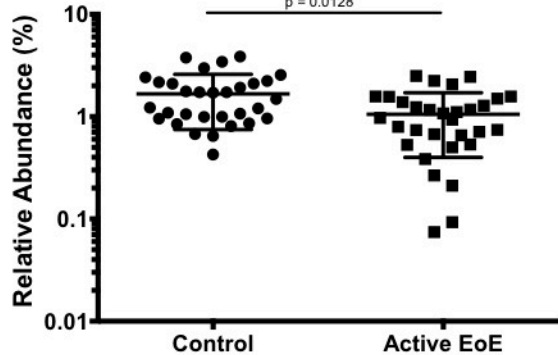

### Atopobium

**B** $p = 0.0332$ 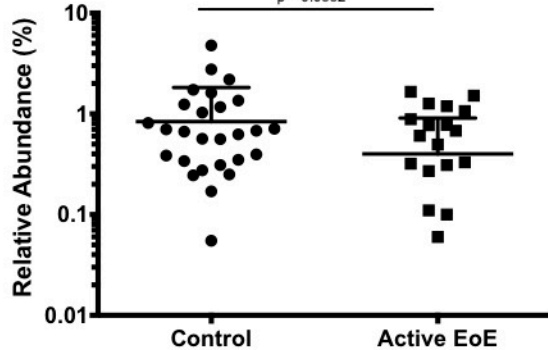

Supplement: 40168_2015_85_MOESM6_ESM.pdf [file 40168_2015_85_MOESM6_ESM.pdf]
