# Supplementary material for: Inflammation-associated microbiota in pediatric eosinophilic esophagitis
Source: Microbiome. 2015 Jun 1;3:23. doi: 10.1186/s40168-015-0085-6 (PMC4450515; doi:10.1186/s40168-015-0085-6)
Supplement: Additional file 1: Table S1A. — Characteristics of non-EoE control pediatric subjects. Data include site of sample collection, disease status, symptoms, demographics, history of atopic disease, diet, endoscopic findings, histologic findings, and peak eosinophils per high power field. [file 40168_2015_85_MOESM1_ESM.pdf]

| Non-EoE Control |      |         |                     |         |        |      |                |    |          |           |              |                                                                                                                  |     |
|-----------------|------|---------|---------------------|---------|--------|------|----------------|----|----------|-----------|--------------|------------------------------------------------------------------------------------------------------------------|-----|
| ID              | Site | Status  | Symptoms            | Age     | Gender | Race | Atopy          | FA | Steroids | Diet      | EGD Findings | Histologic Findings                                                                                              | Eos |
| C01             | O    | Control | GER                 | 10y 7m  | M      | C    | none           | N  | N        | Open diet | Normal       | No pathologic diagnosis                                                                                          | 0   |
| C02             | OE   | Control | none                | 2y 1m   | F      | C    | unknown        | N  | N        | Open diet | Normal       | No pathologic diagnosis                                                                                          | 0   |
| C03             | OE   | Control | GER                 | 5y 11m  | M      | C    | unknown        | N  | N        | Open diet | Normal       | No pathologic diagnosis                                                                                          | 0   |
| C04             | OE   | Control | GER, abdominal pain | 6y 6m   | M      | C    | Asthma         | N  | N        | Open diet | Normal       | No pathologic diagnosis                                                                                          | 0   |
| C05             | OE   | GERD    | abdominal pain, GER | 15y 3m  | F      | C    | none           | N  | N        | Open diet | Normal       | Squamous mucosa showing rare intraepithelial eosinophils                                                         | 2   |
| C06             | OE   | Control | GER                 | 16y 1m  | M      | C    | none           | N  | N        | Open diet | Normal       | No pathologic diagnosis                                                                                          | 0   |
| C07             | OE   | Control | none                | 17y 2m  | M      | C    | Asthma         | N  | N        | Open diet | Furrows      | No pathologic diagnosis                                                                                          | 0   |
| C08             | O    | Control | abdominal pain      | 5y 4m   | F      | C    | none           | N  | N        | Open diet | Normal       | No pathologic diagnosis                                                                                          | 0   |
| C09             | OE   | GERD    | obstructive, GER    | 9y 2m   | M      | C    | AD             | N  | N        | Open diet | Normal       | Squamous mucosa with a focus of infiltrating lymphocytes and single eosinophils compatible with mild esophagitis | 1   |
| C10             | OE   | Control | obstructive, GER    | 10y 11m | M      | C    | none           | N  | N        | Open diet | Normal       | No pathologic diagnosis                                                                                          | 0   |
| C11             | OE   | Control | abdominal pain, GER | 8y 7m   | M      | AA   | AD, Asthma     | N  | N        | Open diet | Normal       | No pathologic diagnosis                                                                                          | 0   |
| C12             | O    | Control | abdominal pain      | 7y 3m   | M      | C    | none           | N  | N        | Open diet | Normal       | No pathologic diagnosis                                                                                          | 0   |
| C13             | OE   | Control | abdominal pain, GER | 7y 4m   | M      | C    | none           | N  | N        | Open diet | Normal       | No pathologic diagnosis                                                                                          | 0   |
| C14             | OE   | Control | abdominal pain, GER | 11y 3m  | M      | C    | Asthma         | N  | N        | Open diet | Normal       | No pathologic diagnosis                                                                                          | 0   |
| C15             | OE   | GERD    | GER                 | 13y 3m  | M      | C    | AD, AR, Asthma | N  | N        | Open diet | Normal       | Reactive squamous mucosa with few intraepithelial eosinophils consistent with mild esophagitis                   | 3   |
| C16             | E    | Control | abdominal pain, GER | 7y 2m   | M      | C    | Asthma         | N  | N        | Open diet | Normal       | No pathologic diagnosis                                                                                          | 0   |
| C17             | E    | Control | abdominal pain, GER | 6y 8m   | M      | C    | none           | N  | N        | Open diet | Normal       | No pathologic diagnosis                                                                                          | 0   |
| C18             | OE   | Control | none                | 4y 8m   | M      | C    | Asthma         | N  | N        | Open diet | Normal       | No pathologic diagnosis                                                                                          | 0   |
| C19             | OE   | Control | none                | 14y 5m  | M      | C    | Asthma         | N  | N        | Open diet | Normal       | No pathologic diagnosis                                                                                          | 0   |
| C20             | OE   | Control | obstructive         | 17y 6m  | M      | C    | none           | N  | N        | Open diet | Furrows      | No pathologic diagnosis                                                                                          | 0   |
| C21             | OE   | Control | obstructive, GER    | 16y 11m | M      | AA   | AD             | N  | N        | Open diet | Normal       | No pathologic diagnosis                                                                                          | 0   |
| C22             | OE   | Control | abdominal pain      | 16y 4m  | M      | C    | none           | N  | N        | Open diet | Normal       | No pathologic diagnosis                                                                                          | 0   |
| C23             | OE   | Control | none                | 14y 8m  | M      | C    | Asthma         | N  | N        | Open diet | Normal       | No pathologic diagnosis                                                                                          | 0   |
| C24             | OE   | Control | abdominal pain, GER | 4y 0m   | M      | AA   | AD, Asthma     | N  | N        | Open diet | Normal       | No pathologic diagnosis                                                                                          | 0   |
| C25             | OE   | Control | GER                 | 9y 5m   | M      | C    | Asthma         | N  | N        | Open diet | Normal       | No pathologic diagnosis                                                                                          | 0   |
| C26             | OE   | Control | GER                 | 4y 4m   | M      | C    | AD             | N  | N        | Open diet | Normal       | No pathologic diagnosis                                                                                          | 0   |
| C27             | OE   | Control | obstructive, GER    | 10y 6m  | M      | C    | AD             | N  | N        | Open diet | Normal       | No pathologic diagnosis                                                                                          | 0   |
| C28             | OE   | GERD    | GER                 | 10y 0m  | M      | C    | Asthma         | N  | N        | Open diet | Normal       | Mild to moderate esophagitis with increased intraepithelial lymphocytes and a rare eosinophil                    | 1   |
| C29             | OE   | GERD    | abdominal pain      | 9y 5m   | M      | C    | none           | N  | N        | Open diet | Normal       | Squamous mucosa with rare single infiltrating eosinophils and a few lymphocytes, mild esophagitis                | 1   |

|            |    |         |                     |        |   |   |            |   |   |           |        |                                                          |   |
|------------|----|---------|---------------------|--------|---|---|------------|---|---|-----------|--------|----------------------------------------------------------|---|
| <b>C30</b> | OE | Control | GER                 | 9y 11m | M | C | none       | N | N | Open diet | Normal | No pathologic diagnosis                                  | 0 |
| <b>C31</b> | OE | Control | none                | 6y 4m  | M | C | none       | N | N | Open diet | Normal | No pathologic diagnosis                                  | 0 |
| <b>C32</b> | OE | Control | abdominal pain      | 11y 2m | F | C | none       | N | N | Open diet | Normal | No pathologic diagnosis                                  | 0 |
| <b>C33</b> | O  | Control | none                | 2y 9m  | M | C | Asthma     | N | N | Open diet | Normal | No pathologic diagnosis                                  | 0 |
| <b>C34</b> | OE | Control | abdominal pain, GER | 8y 5m  | M | C | AD, Asthma | N | N | Open diet | Normal | No pathologic diagnosis                                  | 0 |
| <b>C35</b> | OE | GERD    | obstructive         | 8y 7m  | M | C | AD         | N | N | Open diet | Normal | Squamous mucosa with a single intraepithelial eosinophil | 1 |

**A:** Active

**I:** Inactive

**AA:** African American

**AD:** atopic dermatitis

**AR:** allergic rhinitis

**C:** Caucasian

**E:** esophageal

**EGD:** esophagoduodenoscopy findings

**Eos:** eosinophils per high power field

**FA:** food allergies (by skin prick or patch testing)

**GER:** gastroesophageal reflux

**GERD:** gastroesophageal reflux with esophagitis

**O:** Oral

**OE:** oral and esophageal
